# Supplementary material for: Synthesis and microwave absorption property of flexible magnetic film based on graphene oxide/carbon nanotubes and Fe3O4nanoparticles
Source: Royal Society of Chemistry journal article supplement (doi:10.1039/c4ta02815e), 2014-07-22
Supplement: c4ta02815e1.pdf [file c4ta02815e1.pdf]

Supporting information

# Synthesis and Microwave Absorption Property of Flexible Magnetic Film Based on Graphene Oxide/Carbon nanotubes and $\text{Fe}_3\text{O}_4$ Nanoparticles

Lina Wang,<sup>a‡</sup> Xilai Jia,<sup>a‡</sup> Yongfeng Li,<sup>a\*</sup> Fan Yang,<sup>a</sup> Liqiang Zhang,<sup>a</sup> Liping Liu,<sup>a</sup> Xiao Ren,<sup>b</sup>  
and Haitao Yang<sup>b\*</sup>

<sup>a</sup>State Key Laboratory of Heavy Oil Processing, China University of Petroleum,  
Beijing, Changping 102249, P. R. China.

<sup>b</sup>Beijing National Laboratory for Condensed Matter Physics, Institute of Physics, Chinese Academy  
of Sciences, Beijing 100190, P. R. China.

<sup>‡</sup>These authors contributed equally.

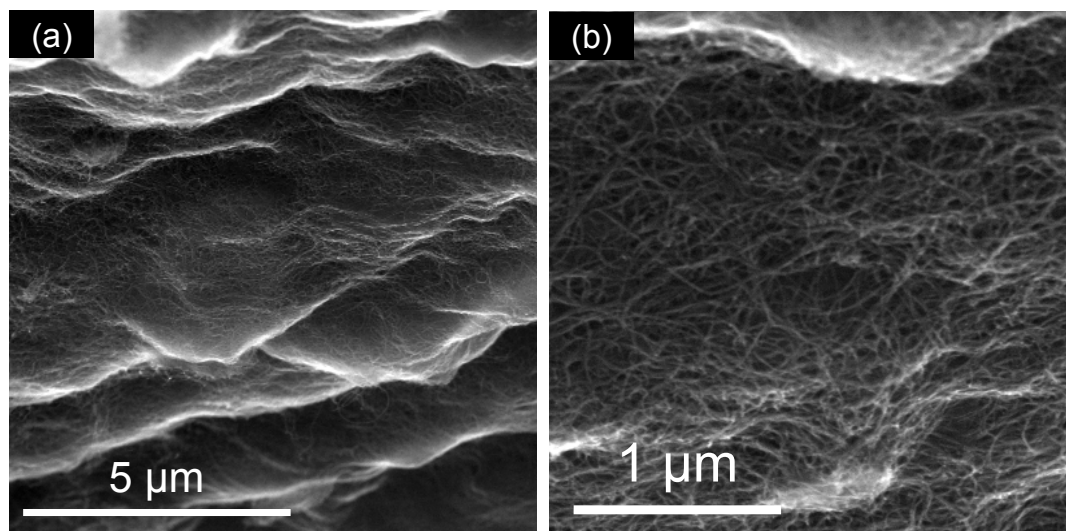

**Fig. S1** The cross-sectional SEM image of GO/CNT composites.
